# Supplementary material for: Z -Scheme g-C 3 N 4 /TiO 2 heterojunction for a high energy density photo-assisted Li–O 2 battery
Source: Royal Society of Chemistry journal article supplement (doi:10.1039/d4tc01832j), 2024-01-01
Supplement: d4tc01832j1.pdf [file d4tc01832j1.pdf]

## Supporting Information

### Z-scheme g-C<sub>3</sub>N<sub>4</sub>/TiO<sub>2</sub> Heterojunction for a High Energy Density Photo-Assisted Li-O<sub>2</sub> Battery

Zhichao Xue<sup>1</sup>, Yingyi Ru<sup>2</sup>, Qiang Li<sup>2</sup>, Xiaolong Liang<sup>2</sup>, Ying Ma<sup>4</sup>, Hong Sun<sup>2\*</sup>, Ying Lv<sup>3\*</sup>

<sup>1</sup>Department of Science, Shenyang Jianzhu University, Shenyang 110168, Liaoning, China

<sup>2</sup>School of Mechanical Engineering, Shenyang Jianzhu University, Shenyang 110168, Liaoning, China

<sup>3</sup>State Key Laboratory of Luminescence and Applications, Changchun Institute of Optics, Fine Mechanics and Physics, Chinese Academy of Sciences, Changchun, 130033, China

<sup>4</sup>School of Materials Science and Engineering, Shenyang Jianzhu University, Shenyang 110168, Liaoning, China

**\* Corresponding author:**

E-mail addresses: lvying@ciomp.ac.cn (Y. Lv), sunhongwxh@sina.com (H. Sun)

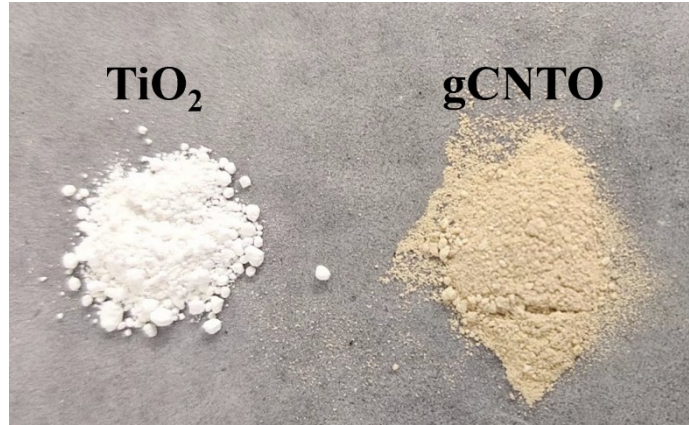

**Figure S1** Digital photos of  $\text{TiO}_2$  and  $\text{g-C}_3\text{N}_4/\text{TiO}_2$

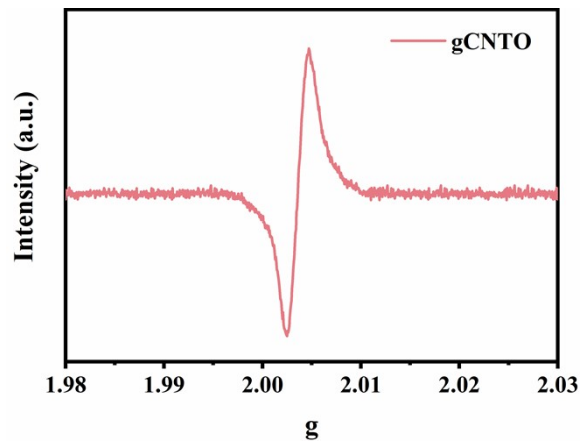

**Figure S2.** EPR image of  $\text{g-C}_3\text{N}_4/\text{TiO}_2$ .

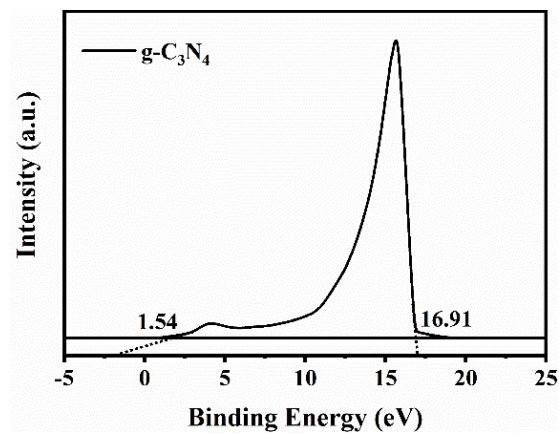

**Figure S3.** UPS image of  $\text{g-C}_3\text{N}_4$ .

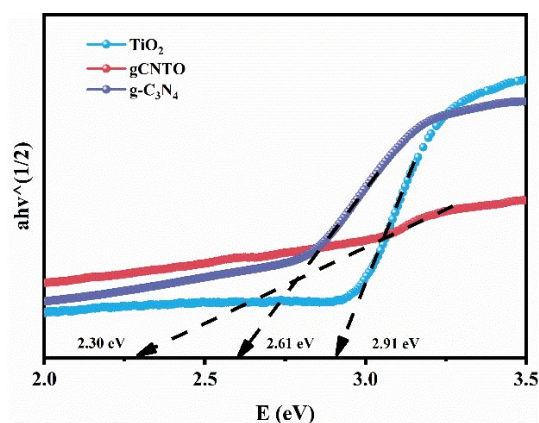

**Figure S4.** The Tauc plots converted from the UV-Vis spectrum show that the  $E_g$  of  $\text{TiO}_2$ , gCNTO, g- $\text{C}_3\text{N}_4$  are 2.30 eV, 2.61 eV, 2.91 eV. Respectively

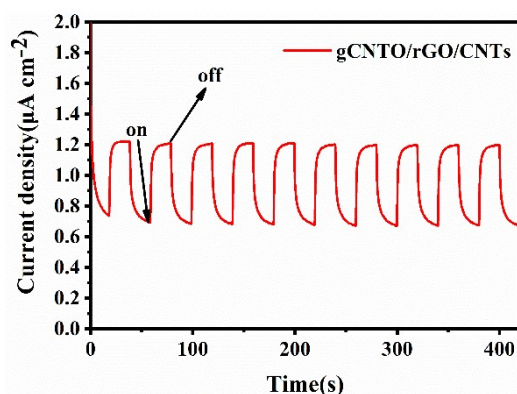

**Figure S5.** i-t curve of gCNTO/rGO/CNTs

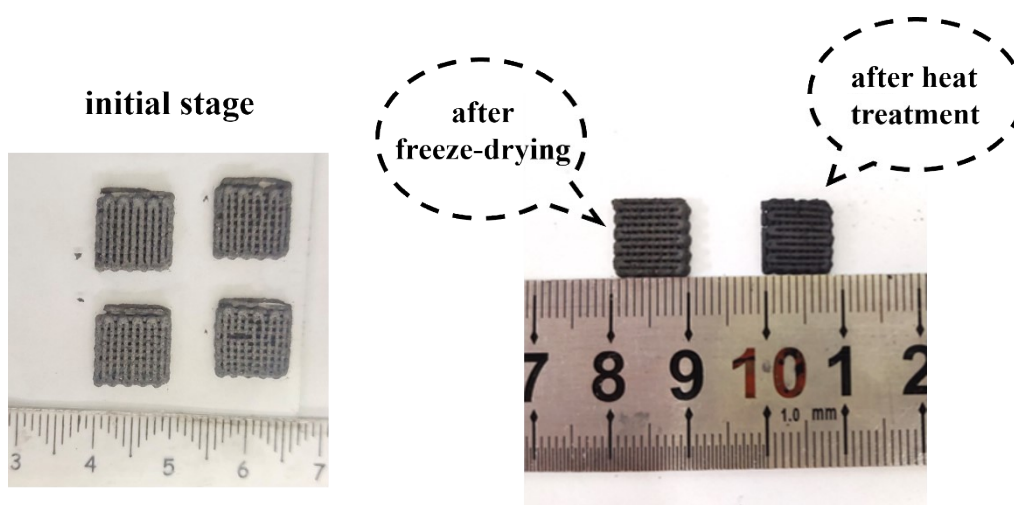

**Figure S6.** The 3D-printed cathode was printed into a gris structure with a

diameter of 10 mm. The structure of the printed cathode was well maintained after both freeze-drying at  $-24\text{ }^{\circ}\text{C}$  and heat treatment at  $500\text{ }^{\circ}\text{C}$ . (After annealing, the mass of the gCNTO/rGO/CNTs electrode was  $13 \pm 3\text{ mg cm}^{-2}$ , and the gCNTO of the mass loading is approximately  $4.78 \pm 0.7\text{ mg cm}^{-2}$  for each gCNTO/rGO/CNTs photocathode. The gCNTO/rGO/CNTs photocathode is a self-supporting cathode without current collector.)

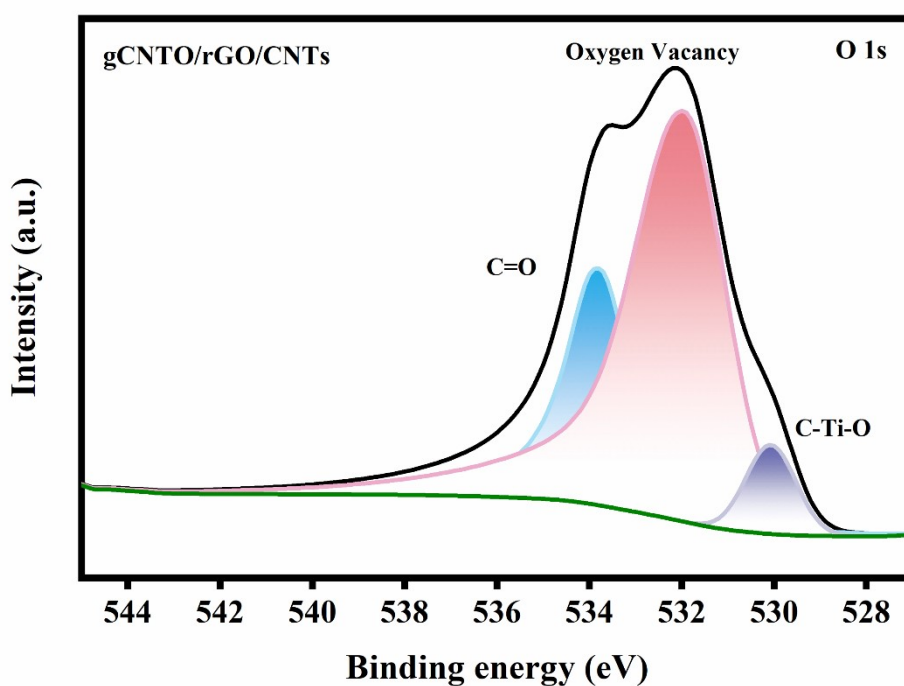

**Figure S7.** The XPS patterns of O 1s for gCNTO/rGO/CNTs are composed of three peaks. The peaks correspond to C=O, Oxygen vacancy, and C-O-Ti bonds, respectively.

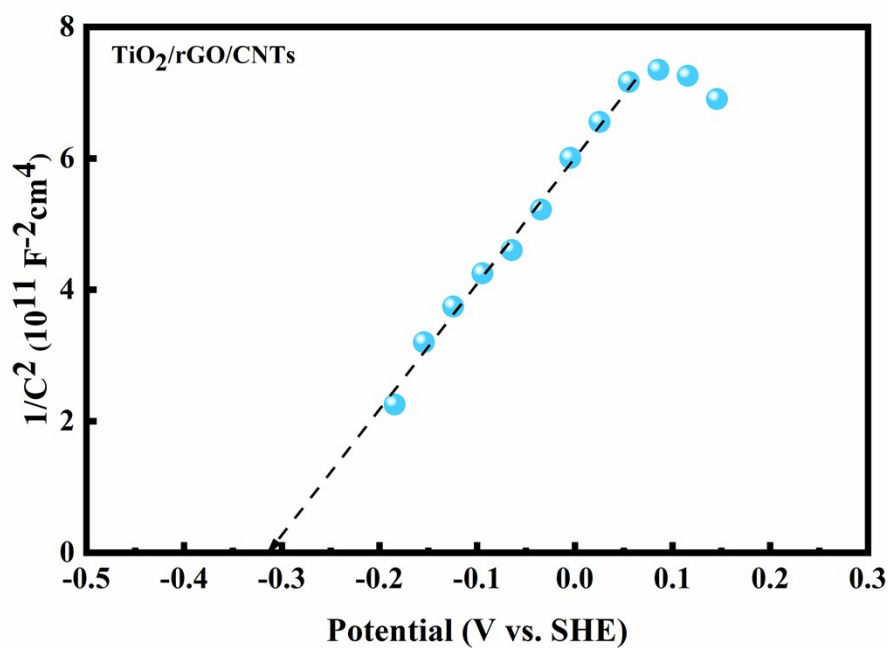

**Figure S8.** M-S plots of  $\text{TiO}_2/\text{rGO}/\text{CNTs}$  show the flatband potential is -0.31 (vs. SHE) and has a positive slope.

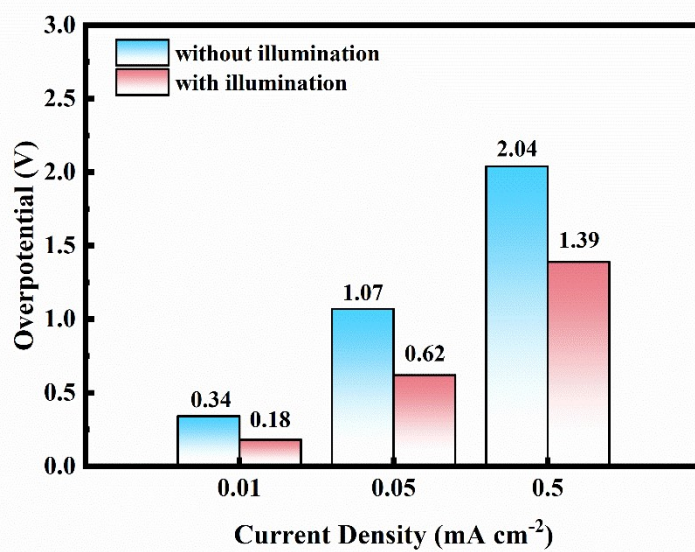

**Figure S9.** Discharge and charge overpotential of Li-O<sub>2</sub> batteries with gCNTO/rGO/CNTs cathodes under light and dark conditions.

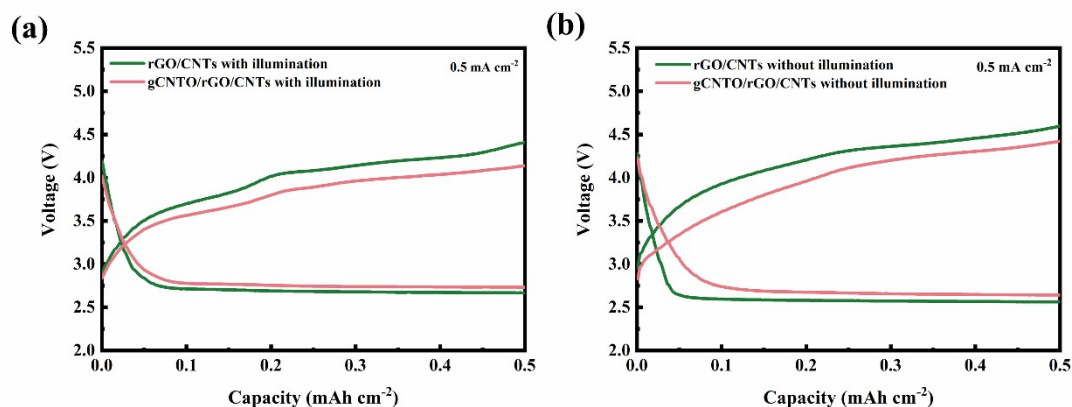

**Figure S10.** (a-b) Charge and discharge profiles of gCNTO/rGO/CNTs and rGO/CNTs at 0.5 mA cm<sup>-2</sup> with and without illumination.

The overpotential of the rGO/CNTs photocathode with illumination is 1.75 V (gCNTO/rGO/CNTs photocathode is 1.4 V), while the overpotential without illumination is 2.04 V (gCNTO/rGO/CNTs photocathode is 1.77 V). It can be clearly observed that the overpotential of the gCNTO/rGO/CNTs photocathode with illumination is significantly smaller than that of the rGO/CNTs photocathode under the same conditions.

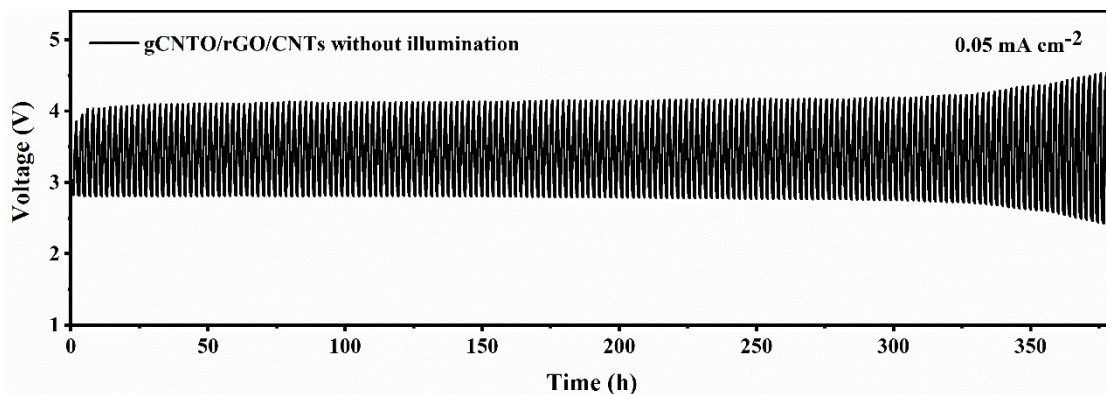

**Figure S11.** The cycle performance of the gCNTO/rGO/CNTs photocathode without illumination at  $0.05 \text{ mA cm}^{-2}$

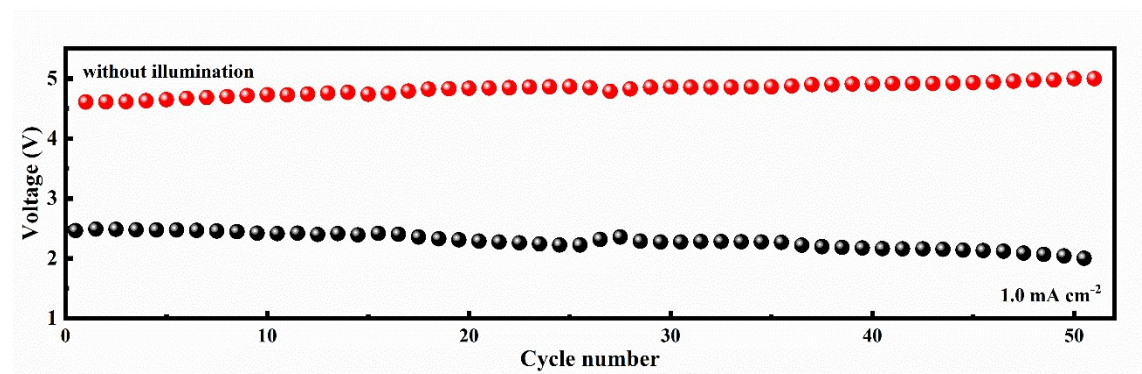

**Figure S12.** The gCNTO/rGO/CNTs cathode can cycle in the dark for 50 cycle number (100 hours) at a current density of  $1.0 \text{ mA cm}^{-2}$ .

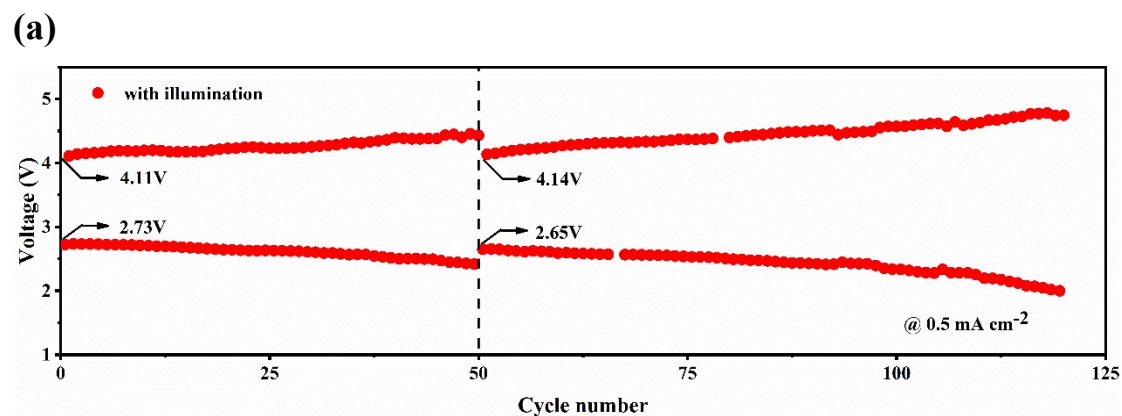

(b)

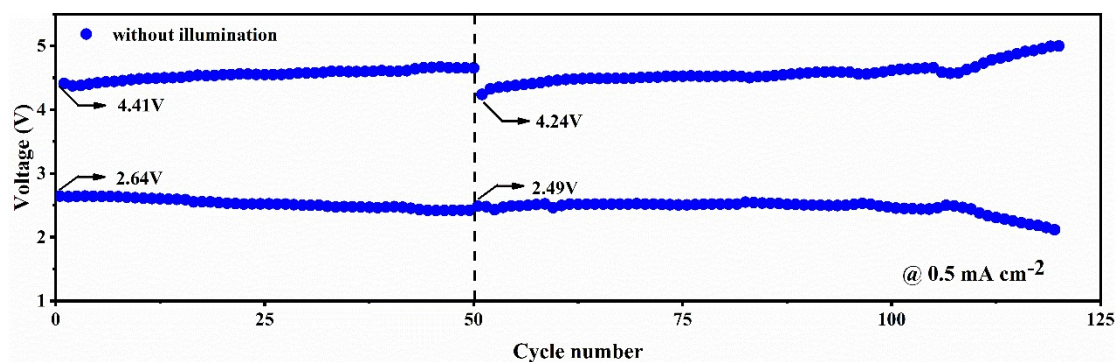

**Figure S13.** (a-b) The 50th cycle number of the gCNTO/rGO/CNTs cathode with and without illumination at the current density of 0.5 mA cm<sup>-2</sup>. Then, replacing the lithium foil in the battery that gCNTO/rGO/CNTs cathode discharge voltage decay to 2.0 V.

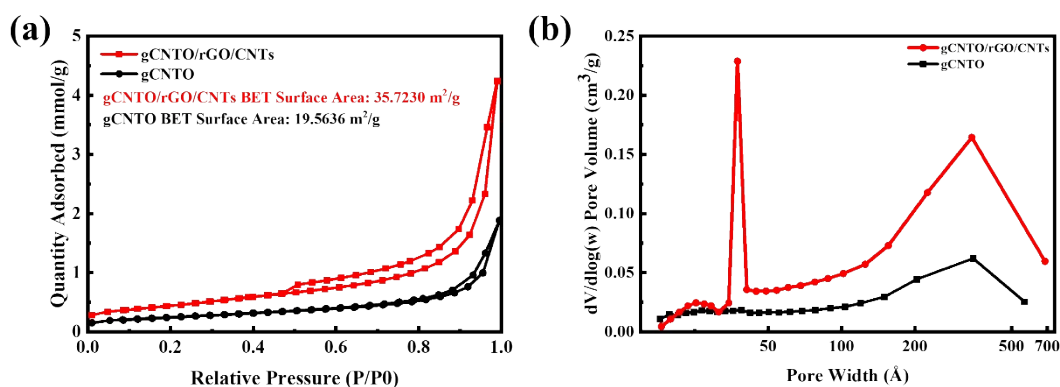

**Figure S14.** (a-b) The N<sub>2</sub> adsorption and desorption isotherms and pore size distributions of the gCNTO and gCNTO/rGO/CNTs cathode.



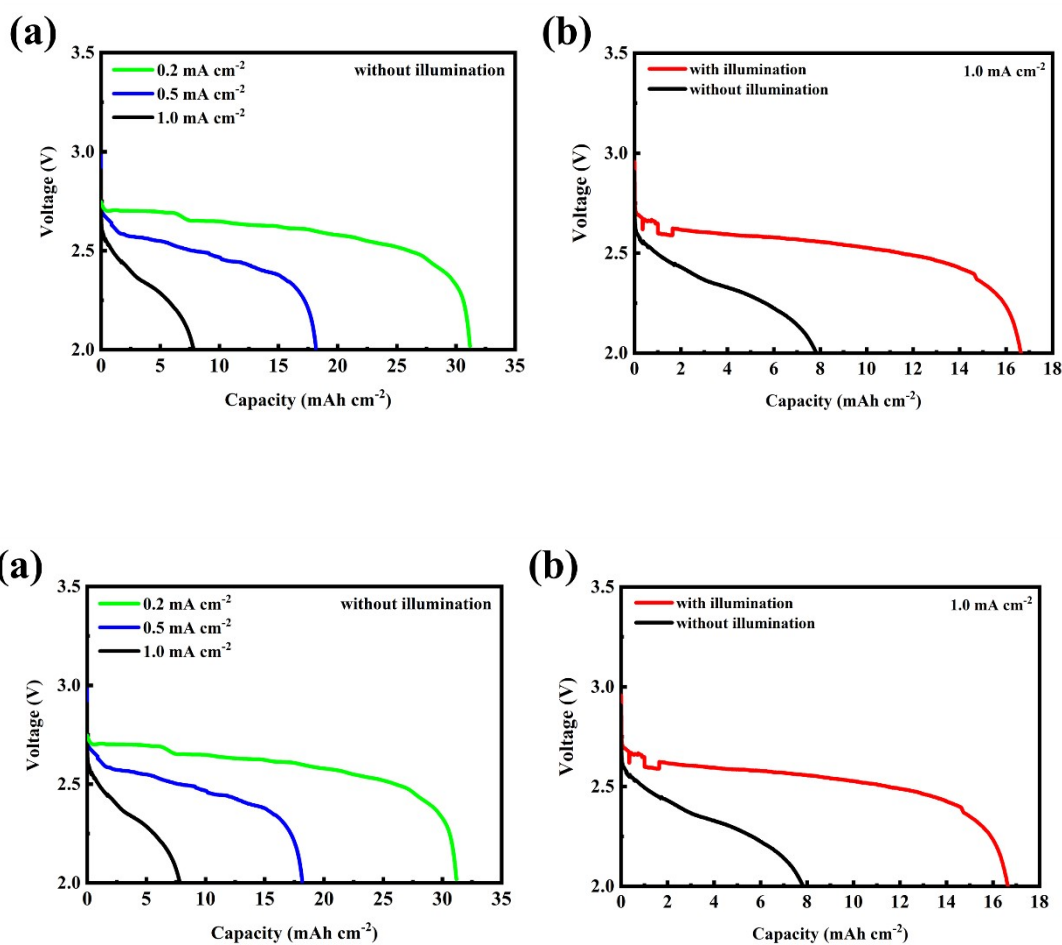

**Figure S15.** (a-b) Discharge capacities of gCNTO/rGO/CNTs cathode at different current densities. Li-O<sub>2</sub> battery of gCNTO/rGO/CNTs cathode under dark conditions demonstrated ultrahigh discharge capacities of 31.19 mAh cm<sup>-2</sup> at 0.2 mA cm<sup>-2</sup>, 18.16 mAh cm<sup>-2</sup> at 0.5 mA cm<sup>-2</sup> and 7.83 mAh cm<sup>-2</sup> at 1.0 mA cm<sup>-2</sup>. In contrast, the discharge capacity of 16.64 mAh cm<sup>-2</sup> at 1.0 mA cm<sup>-2</sup> under light conditions.

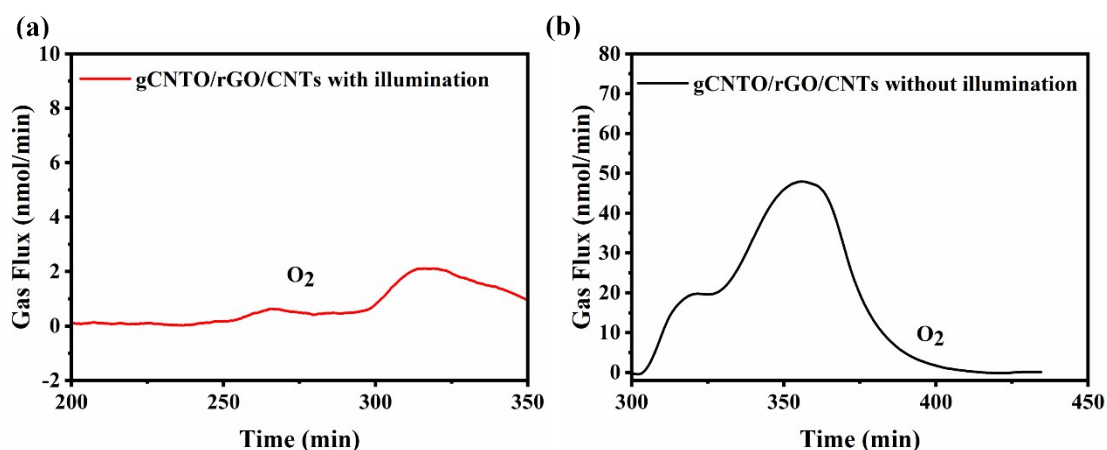

**Figure S16** The DEMS charging test results of (a) gCNTO/rGO/CNTs with illumination (b) gCNTO/rGO/CNTs without illumination

**Table S1**

Discharge capacity of Li-O<sub>2</sub> battery in recent years

| Cathode                 | Current Density                                                            | Discharge Capacity                                              | Load                                         | Ref              |
|-------------------------|----------------------------------------------------------------------------|-----------------------------------------------------------------|----------------------------------------------|------------------|
| gCNTO/rGO/CNTs          | <b>0.5 mA cm<sup>-2</sup><sub>light</sub></b><br>(105 mA g <sup>-1</sup> ) | <b>29.73 mAh cm<sup>-2</sup></b><br>(6220 mAh g <sup>-1</sup> ) | <b>4.78 ± 0.7 mg cm<sup>-2</sup> (gCNTO)</b> | <b>This work</b> |
|                         | <b>0.5 mA cm<sup>-2</sup><sub>dark</sub></b><br>(105 mA g <sup>-1</sup> )  | <b>18.16 mAh cm<sup>-2</sup></b><br>(3799 mAh g <sup>-1</sup> ) |                                              |                  |
|                         | <b>1.0 mA cm<sup>-2</sup><sub>light</sub></b><br>(209 mA g <sup>-1</sup> ) | <b>16.64 mAh cm<sup>-2</sup></b><br>(3481 mAh g <sup>-1</sup> ) |                                              |                  |
| N <sub>0</sub> -wdC-900 | 0.05 mA cm <sup>-2</sup>                                                   | 9.44 mAh cm <sup>-2</sup>                                       | unknown                                      | [1]              |
| Co@NC/PPC-800           | 0.2 mA cm <sup>-2</sup>                                                    | 10.0 mAh cm <sup>-2</sup>                                       | 0.5 ± 0.1 mg                                 | [2]              |

|                                                      |                                                      |                                                           | cm <sup>-2</sup> (catalyst)                    |      |
|------------------------------------------------------|------------------------------------------------------|-----------------------------------------------------------|------------------------------------------------|------|
| Ru-NPC@CBC                                           | 0.2 mA cm <sup>-2</sup>                              | 4.93 mAh cm <sup>-2</sup><br>(12890 mAh g <sup>-1</sup> ) | unknown                                        | [3]  |
| Air-breathable-textile-based cathode                 | 0.1 mA cm <sup>-2</sup>                              | 8.6 mAh cm <sup>-2</sup>                                  | unknown                                        | [4]  |
| MoS <sub>2</sub> /MoN@CC                             | 0.1 mA cm <sup>-2</sup>                              | 9.04 mAh cm <sup>-2</sup>                                 | unknown                                        | [5]  |
| CVO@CNT                                              | 0.1 mA cm <sup>-2</sup>                              | 6.14 mAh cm <sup>-2</sup>                                 | unknown                                        | [6]  |
| CoPt/AFC                                             | 0.05 mA cm <sup>-2</sup><br>(100mA g <sup>-1</sup> ) | 8.25 mAh cm <sup>-2</sup><br>(16505 mAh g <sup>-1</sup> ) | unknown                                        | [7]  |
| LKAC                                                 | 0.2 mA cm <sup>-2</sup>                              | 1.6 mAh cm <sup>-2</sup>                                  | unknown                                        | [8]  |
| 3D-hierarchical Co/CoO/C                             | 0.1 mA cm <sup>-2</sup>                              | 4.8 mAh cm <sup>-2</sup>                                  | unknown                                        | [9]  |
| WNF-0.45                                             | 0.2 mA cm <sup>-2</sup>                              | 23.11 mAh cm <sup>-2</sup>                                | unknown                                        | [10] |
| G6-Co-T                                              | 0.05 mA cm <sup>-2</sup>                             | 2.19 mAh cm <sup>-2</sup><br>(5635 mAh g <sup>-1</sup> )  | 1.3 mg cm <sup>-2</sup><br>(cathode)           | [11] |
| RuO <sub>2</sub> -Co <sub>3</sub> O <sub>4</sub> @CC | 0.3 mA cm <sup>-2</sup>                              | 2.91 mAh cm <sup>-2</sup>                                 | 2.5 mg cm <sup>-2</sup><br>(cathode)           | [12] |
| SnO <sub>2</sub> @C45                                | 0.5 mA cm <sup>-2</sup>                              | 6.5 mAh cm <sup>-2</sup>                                  | unknown                                        | [13] |
| iPPM   iPPM@Li                                       | 0.05 mA cm <sup>-2</sup>                             | 28.14 mAh cm <sup>-2</sup>                                | unknown                                        | [14] |
| O-CNP@NiFe(OH) <sub>x</sub>                          | 0.25 mA cm <sup>-2</sup>                             | 27.5 mAh cm <sup>-2</sup>                                 | unknown                                        | [15] |
| PdSnCo/NG                                            | 0.3 mA cm <sup>-2</sup>                              | 6.75 mAh cm <sup>-2</sup><br>(6750mAh g <sup>-1</sup> )   | 1.0 ± 0.1 mg<br>cm <sup>-2</sup><br>(catalyst) | [16] |

|                                      |                         |                          |                                      |      |
|--------------------------------------|-------------------------|--------------------------|--------------------------------------|------|
| Biphasic N-doping<br>cobalt@graphene | 0.1 mA cm <sup>-2</sup> | 6.0 mAh cm <sup>-2</sup> | 1.0 mg cm <sup>-2</sup><br>(cathode) | [17] |
|--------------------------------------|-------------------------|--------------------------|--------------------------------------|------|

### Equation S1

The specific energy of the photo-assisted Li-O<sub>2</sub> battery were calculated based on the following equation,

$$\text{Specific energy (} \frac{Wh}{g \text{ cell}} \text{)} = \text{Specific capacity (} \frac{Ah}{g \text{ cell}} \text{)} \times \text{potential (V)}$$

Our calculations indicate a specific capacity of 515.12 Wh kg<sup>-1</sup><sub>cell</sub> of in the light at an average discharge potential of 2.60 V with a total mass of 0.15 g including the gCNTO/rGO/CNTs cathode, electrolyte, Fiberglass, and Li metal anode. Similarly, the average discharge potential in the dark state is 2.47 V. An energy density of 298.72 Wh kg<sup>-1</sup><sub>cell</sub> is obtained from the above equation.

## Reference

- [1] S. Jing, Z. Gai, M. Li, S. Tang, S. Ji, H. Liang, F. Chen, S. Yin, P. Tsiakaras, Enhanced Electrochemical Performance Of A Li-O<sub>2</sub> Battery Using Co And N Co-Doped Biochar Cathode Prepared In Molten Salt Medium, *Electrochimica Acta* 410(1) (2022) 140002. <https://doi.org/https://doi.org/10.1016/j.electacta.2022.140002>.
- [2] H.G. Liang, L.H. Jia, F. Chen, Three-Dimensional Self-Standing Co@NC Octahedron/Biochar Cathode For Non-Aqueous Li-O<sub>2</sub> Batteries: Efficient Catalysis For Reversible Formation And Decomposition Of LiOH, *Journal of Materials Science* 55(18) (2020) 7792-7804. <https://doi.org/10.1007/s10853-020-04574-x>.
- [3] M.L. Wang, Y. Yao, F.Y. Yang, Z.W. Tang, J.J. Ren, C.Z. Zhang, F. Wu, X.K. Wang, Double Spatial Confinement On Ruthenium Nanoparticles Inside Carbon Frameworks As Durable Catalysts For A Quasi-Solid-State Li-O<sub>2</sub> Battery, *CARBON ENERGY* 5(8) (2023) e334.
- ..
- [4] S.M. Xu, Y.G. Yao, Y.Y. Guo, X.Q. Zeng, S.D. Lacey, H.Y. Song, C.J. Chen, Y.J. Li, J.Q. Dai, Y.B. Wang, Y.A. Chen, B.Y. Liu, K. Fu, K. Amine, J. Lu, L.B. Hu, Textile Inspired Lithium-Oxygen Battery Cathode With Decoupled Oxygen And Electrolyte Pathways, *ADVANCED MATERIALS* 30(4) (2018) 1704907.

<https://doi.org/10.1002/adma.201704907>.

[5] Y.T. Gu, Y. Ma, L. Wei, Y.B. Lian, Y. He, Y.H. Su, X.J. Li, Y. Peng, Z. Deng, Conformal Lithium Peroxide Growth Kinetically Driven By MoS<sub>2</sub>/MoN Heterostructures Towards High-Performance Li-O<sub>2</sub> Batteries, BATTERIES & SUPERCAPS 5(9) (2022) e202200222. <https://doi.org/10.1002/batt.202200222>.

[6] D. Li, X. Lang, Y. Guo, Y. Wang, Y. Wang, H. Shi, S. Wu, W. Wang, Q.-H. Yang, A Photo-Assisted Electrocatalyst Coupled With Superoxide Suppression For High Performance Li-O<sub>2</sub> Batteries, Nano Energy 85 (2021) 105966. <https://doi.org/https://doi.org/10.1016/j.nanoen.2021.105966>.

[7] H. Xia, Q. Xie, Y. Tian, Q. Chen, M. Wen, J. Zhang, Y. Wang, Y. Tang, S. Zhang, High-Efficient CoPt/activated Functional Carbon Catalyst For Li-O<sub>2</sub> Batteries, Nano Energy 84 (2021) 105877. <https://doi.org/https://doi.org/10.1016/j.nanoen.2021.105877>.

[8] G.Z. Zhang, Y. Yao, T. Zhao, M.L. Wang, R.J. Chen, From Black Liquor to Green Energy Resource: Positive Electrode Materials for Li-O<sub>2</sub> Battery With High Capacity And Long Cycle Life, ACS APPLIED MATERIALS & INTERFACES 12(14) (2020) 16521-16530. <https://doi.org/10.1021/acsami.0c01520>.

[9] C. Hua, Z. Qian, M. Chen, C. Du, P. Zuo, X. Cheng, Y. Ma, G. Yin, 3D Hierarchical Co/CoO/C Nanocomposites With Mesoporo

us Microsheets Grown On Nickel Foam As Cathodes For Li-O<sub>2</sub> Batteries, Journal of Alloys and Compounds 749(15) (2018) 378-384. <https://doi.org/https://doi.org/10.1016/j.jallcom.2018.03.297>.

[10] L. Wei, Y. Su, Y. Ma, Y. Gu, Y. Qin, X. Wu, Y. He, X. Li, Y. Peng, Z. Deng, Photoluminescent WSe<sub>2</sub> Nanofibers As Freestanding Cathode For Solar-Assisted Li-O<sub>2</sub> Battery With Ultrahigh Capacity And Transparent Casing, Chemical Engineering Journal 448(15) (2022) 137591. <https://doi.org/https://doi.org/10.1016/j.cej.2022.137591>.

[11] W.H. Wang, A.Y. Tesio, M. Olivares-Marín, P.G. Romero, D. Tonti, Facile Preparation Of Glycine-Based Mesoporous Graphitic Carbons With Embedded Cobalt Nanoparticles, JOURNAL OF MATERIALS SCIENCE 57(28) (2022) 13403-13413. <https://doi.org/10.1007/s10853-022-07421-3>.

[12] X. Peng, M. Li, L. Huang, Q. Chen, W. Fang, Y. Hou, Y. Zhu, J. Ye, L. Liu, Y. Wu, RuO<sub>2</sub>-Incorporated Co<sub>3</sub>O<sub>4</sub> Nanoneedles Grown On Carbon Cloth As Binder-Free Integrated Cathodes For Tuning Favorable Li<sub>2</sub>O<sub>2</sub> Formation, ACS Applied Materials & Interfaces 15(1) (2023) 1401-1409. <https://doi.org/10.1021/acsami.2c19399>.

[13] J. Amici, P. Marquez, A. Mangini, C. Torchio, D. Dessantis, D. Versaci, C. Francia, M.J. Aguirre, S. Bodoardo, Sustainable, Economic, And Simple Preparation Of An Efficient Catalyst for Li-O<sub>2</sub> Batteries, Journal Of Power Sources 546(30) (2022) 231942. <https://doi.org/https://doi.org/10.1016/j.jpowsour.2022.231942>.

- [14] Y. He, L.Y. Ding, J. Cheng, S.W. Mei, X.L. Xie, Z.Y. Zheng, W.Y. Pan, Y.Z. Qin, F.D. Huang, Y. Peng, Z. Deng, A "Trinity" Design Of Li-O<sub>2</sub> Battery Engaging The Slow-Release Capsule Of Redox Mediators, *ADVANCED MATERIALS* 35(49) (2023) 2308134. <https://doi.org/10.1002/adma.202308134>.
- [15] B. Zhao, Z. Ye, X. Kong, L. Han, Z. Xia, K. Chen, Q. Wang, M. Li, Y. Shang, A. Cao, Orthogonal-Channel, Low-Tortuosity Carbon Nanotube Platforms For High-Performance Li-O<sub>2</sub> Batteries, *ACS Nano* 17(18) (2023) 18382-18391. <https://doi.org/10.1021/acsnano.3c05782>.
- [16] X. Ren, B. Liao, Y. Li, P. Zhang, L. Deng, Y. Gao, Facile Synthesis Of PdSnCo/nitrogen-Doped Reduced Graphene As A Highly Active Catalyst For Lithium-Air Batteries, *Electrochimica Acta* 228(20) (2017) 36-44. <https://doi.org/https://doi.org/10.1016/j.electacta.2017.01.032>.
- [17] G.Q. Tan, L.N. Chong, R. Amine, J. Lu, C. Liu, Y.F. Yuan, J.G. Wen, K. He, X.X. Bi, Y.Y. Guo, H.H. Wang, R. Shahbazian-Yassar, S. Al Hallaj, D.J. Miller, D.J. Liu, K. Amine, Toward Highly Efficient Electrocatalyst For Li-O<sub>2</sub> Batteries Using Biphasic N-Doping Cobalt@Graphene Multiple-Capsule Heterostructures, *NANO LETTERS* 17(5) (2017) 2959-2966. <https://doi.org/10.1021/acs.nanolett.7b00207>.
